# Supplementary material
Source: HighWire-hosted journal article supplement (https://ijgc.bmj.com/content/30/7/993)
Supplement: inline-supplementary-material-2 [file inline-supplementary-material-2.pdf]

**Supplementary Table 1**

| Case | Age at Diagnosis | Stage | Grade and histology   | PD-L1 expression              | MMR status                          |
|------|------------------|-------|-----------------------|-------------------------------|-------------------------------------|
| 1    | 39               | IA    | 2<br>Endometrioid     | Tumor: 1-5%<br>Immune: 1-5%   | PMS2 loss<br>c.150delinsAG          |
| 2    | 64               | IA    | 1<br>Endometrioid     | Tumor: 1-5%<br>Immune: 11-25% | MSH6 loss<br>Germline negative      |
| 3    | 58               | IA    | 1<br>Endometrioid     | Tumor: 1-5%<br>Immune: 6-10%  | MSH2/MSH6 loss<br>Germline negative |
| 4    | 61               | IIIC1 | 3<br>Dedifferentiated | Tumor: 6-10%<br>Immune: 6-10% | MSH2/MSH6 loss<br>Germline negative |

**Supplementary Figure 1.** This MSH2/MSH6-deficient, de-differentiated endometrioid carcinoma showed nuclear  $\beta$ -catenin in a subset of cells (200x, A: Hematoxylin & Eosin; B:  $\beta$ -catenin). PD-L1 was predominantly negative in the tumor but was strongly positive in tumor-associated macrophages (200x, C: PD-L1).
